# Supplementary material for: Nuevos Derechos Europeos
Source: Atypon-hosted journal article supplement (doi:10.1176/appi.ajp.2017.16101191), 2010-01-01
Supplement: appi.ajp.2017.16101191.ds001.pdf [file appi.ajp.2017.16101191.ds001.pdf]

 


Psychiatry Online
